# Supplementary material for: Water-in-oil droplet-mediated method for detecting and isolating infectious bacteriophage particles via fluorescent staining
Source: Frontiers journal article supplement (doi:10.3389/fmicb.2023.1282372), 2023-12-06
Supplement: Data_Sheet_1.PDF [file Data_Sheet_1.PDF]

## Supplementary Information

Table S1. Number of droplets assessed and plotted to create Figure 2.

| Phage concentration (PFU/mL) | Total number of droplets assessed | Number of droplet data excluded | Number of data used to create figure |
|------------------------------|-----------------------------------|---------------------------------|--------------------------------------|
| $2.3 \times 10^8$            | 20082                             | 585                             | 19497                                |
| $2.3 \times 10^7$            | 20048                             | 6522                            | 13526                                |
| $2.3 \times 10^6$            | 20082                             | 584                             | 19498                                |
| $2.3 \times 10^5$            | 20045                             | 810                             | 19235                                |
| $2.3 \times 10^4$            | 20104                             | 1117                            | 18987                                |
| 0                            | 20177                             | 1116                            | 19061                                |

Table S2. Number of droplets assessed and plotted to create Figure 3a.

| Time Point (h) | Total number of droplets assessed | Number of droplet data excluded | Number of data used to create figure |
|----------------|-----------------------------------|---------------------------------|--------------------------------------|
| 0              | 40044                             | 1528                            | 38516                                |
| 1              | 40058                             | 1832                            | 38226                                |
| 3              | 40140                             | 2291                            | 37849                                |
| 5              | 40089                             | 3065                            | 37024                                |
| 7              | 40070                             | 4073                            | 35997                                |
| 9              | 40177                             | 2549                            | 37257                                |
| 24             | 40136                             | 2466                            | 37670                                |

Table S3. Number of droplets assessed and plotted to create Figure 3b.

| Time Point (h) | Total number of droplets assessed | Number of droplet data excluded | Number of data used to create figure |
|----------------|-----------------------------------|---------------------------------|--------------------------------------|
| 0              | 40051                             | 2729                            | 37124                                |
| 1              | 40123                             | 4082                            | 36041                                |
| 3              | 40132                             | 5489                            | 34643                                |
| 5              | 40082                             | 2574                            | 37508                                |
| 7              | 40090                             | 2435                            | 37655                                |
| 9              | 40017                             | 2389                            | 37628                                |
| 24             | 40053                             | 2689                            | 37364                                |

## Supplementary Information

Equation S1. Calculation of the  $\lambda_{\text{phg}}$  using the titer of the original phage solution.

Titer of original phage solution : X PFU/mL

Average volume of individual droplets upon generation, calculated from droplet diameters : Y pL

Average number of phage particles in a droplet ( $\lambda_{\text{phg}}$ ):

$$\lambda_{\text{phg}} = \frac{X \text{ (PFU/10}^9\text{pL)}}{Y \text{ (pL)}}$$

Equation S2. Calculation of particle concentration ( $\lambda$ ) using Poisson Distribution.

Poisson distribution formula:

$$P_{(m)} = \frac{\lambda^m e^{-\lambda}}{m!} \quad (1)$$

$P_{(m)}$ : Probability of a droplet having  $m$  particles

$\lambda$ : average number of phage particles in a droplet

Because droplets without phage ( $m = 0$ ) are non-fluorescent,  $m = 0$  and the percentage of non-fluorescent droplets can be used to gauge the initial  $\lambda$ .

$$\begin{aligned} P_{(0)} &= \frac{\lambda^0 e^{-\lambda}}{0!} \\ &= e^{-\lambda} \end{aligned} \quad (2)$$

$$\begin{aligned} \ln P_{(0)} &= \ln e^{-\lambda} \\ &= -\lambda \end{aligned} \quad (3)$$

$$\lambda = -\ln P_{(0)} \quad (4)$$

# Supplementary Information

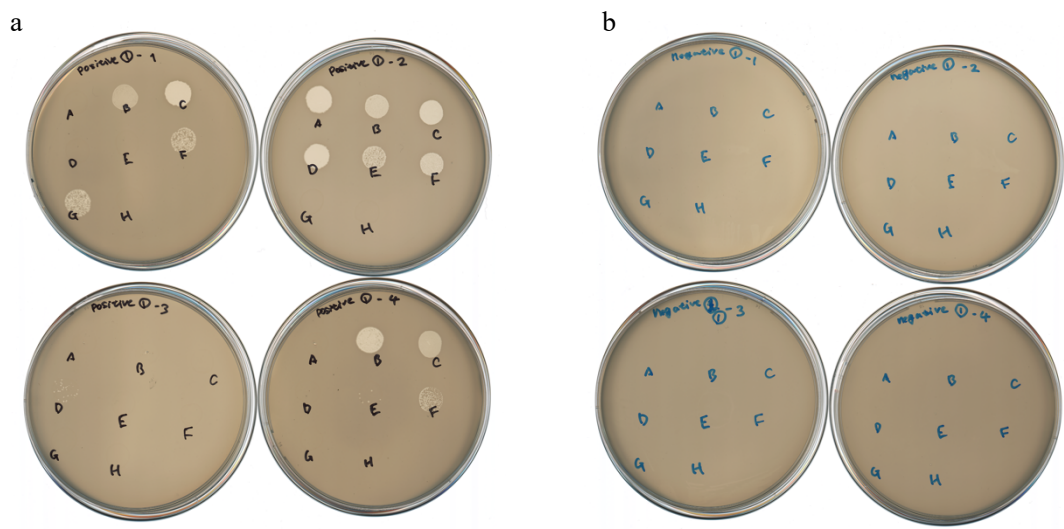

Figure S1. Plates after spot assay of culture medium derived from scale-up cultivation of isolated single droplets. Droplet samples containing T2 phage, *E. coli* and YOYO-1 were generated and incubated. After 5 h of incubation, droplets with high fluorescence intensities (S1a) and low fluorescence intensities (S1b) were isolated into 96-well plates, where steps for droplet rupturing and scale-up cultivation were performed. These culture media were scaled-up from individual droplets and used for spot assays. The letters in the photos depict the rows (A–H) of the 96-well plate from which the spot assays were conducted, and the numbers written on at the top depict the 96-well plate name (Positive①, Negative①) and columns (1–4). Numerous spots are observed in S1a, while no spots were observed in any of the plates shown in figure S1b, where spot assays using culture media scaled up from droplets with low fluorescence intensities were performed.

## Supplementary Information

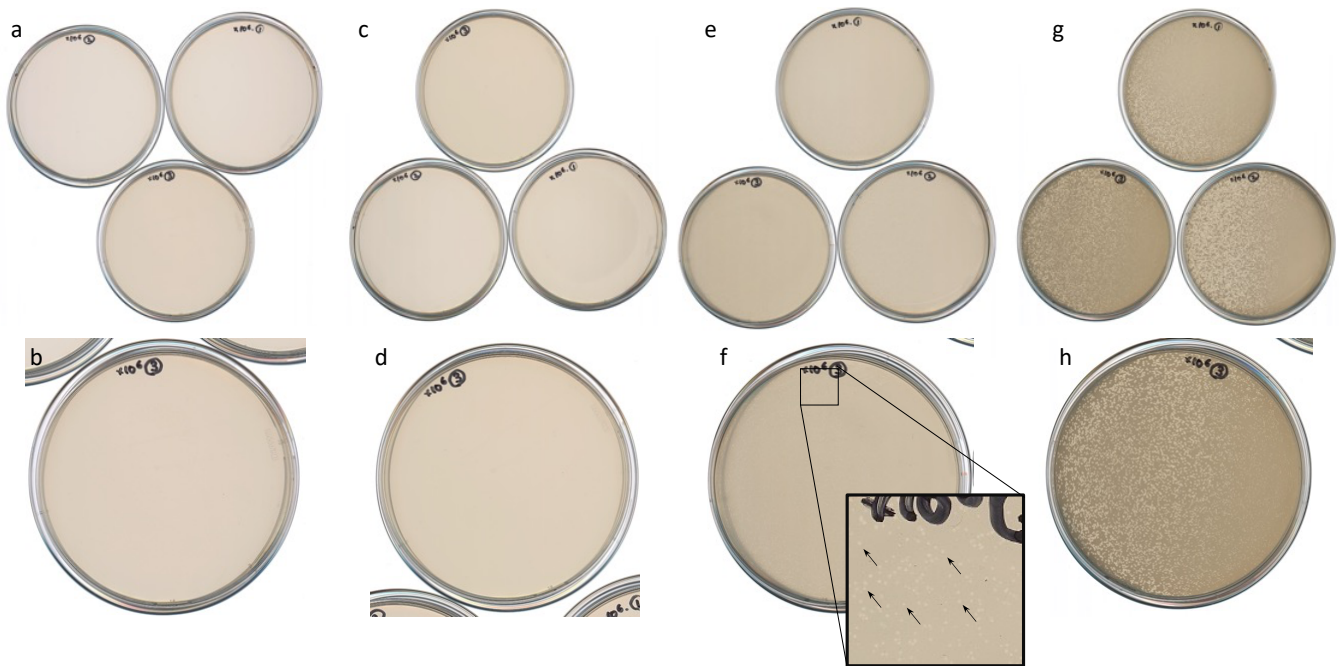

Figure S2. Surveillance of plaques over time.

The T2 phage and *E. coli* were mixed into a 802 soft agar solution to produce plaques. The plates onto which 3 mL each of soft agar was poured over normal 802 agar solution ( $n = 3$ ) were incubated at 30 °C, removed and photographed after approximately 1 (a, b), 3 (c, d), 5 (e, f), and 24 (g, h) h of plating. A slight darkening of the overall color of the plates was observed as the incubation time increased, due to host cell growth. Plaques started to appear after 5 h of incubation (indicated with arrows) and continued to become clearer with incubation time.
